# Supplementary material
Source: publisher site journal article supplement (https://www.dovepress.com/article/414327)
Supplement: Supplementary file 1 [file get_supplementary_file.php]

**Supplementary Materials**

**Questionnaire survey on insulin pump knowledge, attitude, and behavior of nurses in the non-endocrinology departments**

Hello!

I am Mo Cuiying, a nurse in the diabetes department of the First People’s Hospital of Foshan. In order for our specialist nurses to better manage insulin pumps in non-endocrinology departments and provide safer care for patients using insulin pumps, we are currently conducting a questionnaire survey on knowledge, belief, and practice of insulin pumps in non-endocrinology departments. Insulin pumps are mainly used in endocrinology departments, operated by professional nurses. Nurses in non-endocrinology departments can actively manage insulin pumps only if they understand the knowledge about insulin pumps and establish correct and positive beliefs and attitudes. This improves the safety of the device in the non-diabetic area and better guarantees the insulin pump’s effectiveness in diabetic patients. The content of this questionnaire is divided into two parts: the first part is the basic situation of the individual; the second part is the items of the insulin pump knowledge, belief, and practice questionnaire. The information you will provide will be kept confidential.

Thank you very much for filling out this questionnaire in your busy schedule, and thank you for your support of our work!

1. Basic information

Your hospital:

Gender: □Male □Female

Age: Years Working Years: Years Department: Section

Title: □Nurse □Nurse □Nurse-in-charge □Assistant nurse □Nurse-in-charge

Education: □Technical secondary school □College □Undergraduate □Graduate □Other

Position: □Head nurse □Nursing team leader □Senior responsible nurse □Responsible nurse □Specialist nurse □Research nurse

Diabetes Liaison Nurse: □ Yes □ No

**Insulin pump knowledge (17 items, 0 points for wrong answers or incomplete options, 5 points for correct answers)**

1. The working principle of insulin pump ( )

A. The insulin input device controlled by artificial intelligence is used to simulate the physiological secretion mode of insulin.

B. By means of continuous subcutaneous infusion of insulin

2. Indications for insulin pump therapy ( )

A. Type 1 diabetes patients

B. Patients with type 2 diabetes requiring intensive treatment

C. Gestational diabetes

D. Perioperative blood glucose control in diabetic patients

3. Contraindications to insulin pump therapy ( )

A. Those who are allergic to subcutaneous infusion tubes

B. Those with severe mental disorders or mental abnormalities

C. Those who are young or old without guardians and unable to take care of themselves

D. Acute complications of diabetic ketoacidosis

4. The type of insulin used by the insulin pump ( )

A. Rapid-acting insulin analogs

B. Short-acting human insulin

C. Long-acting insulin

D. Premixed insulin

5. Common blood sugar control goals of insulin pump therapy for patients with type 2 diabetes ( )

A. Fasting blood sugar 4.4-7 mmol/L; non-fasting blood glucose <10.0 mmol/L

B. Fasting blood sugar 5-8 mmol/L; postprandial blood sugar 5-10 mmol/L

C. Fasting blood sugar 4-8 mmol/L; postprandial blood sugar 6-10 mmol/L

D. Fasting blood sugar ≤ 5.3 mmol/L; postprandial blood sugar ≤6.7 mmol/L

6. There ways of administering insulin pumps include ( )

A. Basic amount

B. Large dose before a meal

C. Intravenous injection

D. Intradermal injection

7. The site where the insulin pump is implanted ( )

A. Abdomen;

B. Upper arm;

C. Outer thigh;

D. Back waist, buttocks;

E. In the third trimester of pregnancy, other parts can be selected appropriately, such as the lower back, outer thigh, and arm

8. Observation points after installing the insulin pump ( )

A. Blood sugar status

B. Patient’s eating status

C. Insulin pump operation status

D. Insulin dose

E. The puncture site and surrounding skin

9. The content of the daily inspection during the use of the insulin pump is ( )

A. Screen display

B. The power of the battery

C. Whether the basic rate review and high-dose history are correct

D. The remaining amount of insulin in the drug storage device

E. Infusion line and injection site

10. The ambient temperature where the insulin pump is placed ( )

A. Do not put it above 40°C and below 0°C, and do not put it in the refrigerator

B. Can be stored in the refrigerator

11. High-pressure environment affecting insulin pump function ( )

A. Hyperbaric oxygen chamber, high-pressure sterilization

B. Not sure

12. Strong radiation and strong magnetic fields that affect the function of insulin pumps ( )

A. B ultrasound

B. X-ray, MR, magnetic therapy bed

C. Not sure

13. If a fasting examination is required, X-ray, MRI, CT scan, PET/SPET, HIFU knife, hyperbaric oxygen, or other types of radiation examination are required, the insulin pump must be removed and removed from the radiation area. Do not expose the pump to a strong magnetic field to avoid accidents. ( )

A. Yes

B. Wrong

14. Insulin pump handling when the patient showers ( )

A. The insulin pump must be separated

B. No need to deal with

C. Don’t know

15. When the insulin pump is accidentally immersed in water, what should be done: ( )

A. Disconnect the pump from the body, and dry the pump casing with a soft cloth

B. Take out the medicine storage device and dry the medicine storage chamber with a clean, soft cloth

C. Contact the endocrinology department

D. Use a hot blower to dry

16. Common alarm types ( )

A. Battery-related issues

B. Low residual fluid volume

C. No infusion alarm

D. Static electricity

17. Operation processing when the insulin pump alarm occurs ( )

A. Press any key to view the alarm

B. Press ESC and ACT to clear the alarm

C. Don’t know

**Belief (10 items, with 1 to 5 points in turn.)**

18. I think it is very important for non-endocrinology nurses to master the alarm recognition of insulin pumps and large-dose injections before meals ( )

A. Very unimportant

B. Not important

C. General

D. Important

E. Very important

19. I think it is very important for non-endocrinology nurses to handover patients who use insulin pumps and check the operation of insulin pumps every shift ( )

A. Very unimportant

B. Not important

C. General

D. Important

E. Very important

20. I think non-endocrinology nurses know that it is important to replace insulin pump tubing regularly ( )

A. Very unimportant

B. Not important

C. General

D. Important

E. Very important

21. I think it is important for non-endocrinology nurses to observe the injection site ( )

A. Very unimportant

B. Not important

C. General

D. Important

E. Very important

22. I think it is important for non-endocrinology nurses to pay attention to the diet of patients during insulin pump treatment ( )

A. Very unimportant

B. Not important

C. General

D. Important

E. Very important

23. I think it is very important for non-endocrinology nurses to correctly inject large doses before meals ( )

A. Very unimportant

B. Not important

C. General

D. Important

E. Very important

24. I think it is very important for non-endocrinology nurses to contact the pump nurses of the endocrinology department in a timely manner after problems occur during insulin pump treatment ( )

A. Very unimportant

B. Not important

C. General

D. Important

E. Very important

25. I think it is very important for non-endocrinology nurses to tell patients when to eat after each pre-meal large-dose injection ( )

A. Very unimportant

B. Not important

C. General

D. Important

E. Very important

26. I think it is very important for non-endocrinology nurses to evaluate patients’ blood sugar every shift ( )

A. Very unimportant

B. Not important

C. General

D. Important

E. Very important

27. I think it is very important for non-endocrinology nurses to check the alarm status of the insulin pump and deal with the alarm in time ( )

A. Very unimportant

B. Not important

C. General

D. Important

E. Very important

**Behavior (17 items, with 1 to 5 points in turn.)**

28. Before installing the insulin pump, did you take out the refrigerated insulin 30-60 minutes before rewarming ( )

A. Never

B. Occasionally

C. Sometimes

D. Often

E. Always

29. Have you observed the maintenance of the pipeline of the patient’s insulin pump, whether there is any distortion, discount, etc. ( )

A. Never

B. Occasionally

C. Sometimes

D. Often

E. Always

30. Have you observed the skin condition of the patient’s insulin pump puncture point ( )

A. Never

B. Occasionally

C. Sometimes

D. Often

E. Always

31. Do you separate the insulin pump when the patient takes a bath and undergoes X-ray, MRI, CT scan, PET/SPET, Hi-knife, hyperbaric oxygen, or other types of radiography ( )

A. Never

B. Occasionally

C. Sometimes

D. Often

E. Always

**32. Do you check whether the insulin pump is running normally and whether the high-dose injection before meals is accurate every morning when you take over from work? ( )**

A. Never

B. Occasionally

C. Sometimes

D. Often

E. Always

33. Do you pay attention to the replacement time of the insulin pump pipeline? ( )

A. Never

B. Occasionally

C. Sometimes

D. Often

E. Always

34. After the patient installs the insulin pump, do you explain the precautions for use to the patient ( )

A. Never

B. Occasionally

C. Sometimes

D. Often

E. Always

35. After installing the insulin pump, do you emphasize the symptoms and treatment of hypoglycemia to the patient? ( )

A. Never

B. Occasionally

C. Sometimes

D. Often

E. Always

36. If the patient has induration or pain at the injection site, will you contact the endocrinology nurse? ( )

A. Never

B. Occasionally

C. Sometimes

D. Often

E. Always

37. Regarding the Insulin pump alarm, will you identify and contact the endocrinology nurse in time? ( )

A. Never

B. Occasionally

C. Sometimes

D. Often

E. Always

38. During the use of the islet pump, when hyperglycemia (≥16.7mmol/L) occurs, do you immediately notify the doctor in charge and the nurse in the endocrinology department? ( )

A. Never

B. Occasionally

C. Sometimes

D. Often

E. Always

39. During the use of the islet pump, when hypoglycemia (≤3.9mmoL) occurs, do you immediately notify the doctor in charge and the nurse in the endocrinology department? ( )

A. Never

B. Occasionally

C. Sometimes

D. Often

E. Always

40. After each pre-meal large-dose injection, will you explain the patient’s meal time? ( )

A. Never

B. Occasionally

C. Sometimes

D. Often

E. Always

41. Will you evaluate the patient’s blood sugar before taking a pre-meal large-dose injection? ( )

A. Never

B. Occasionally

C. Sometimes

D. Often

E. Always

42. Will you evaluate the patient’s eating situation before the pre-meal large-dose injection? ( )

A. Never

B. Occasionally

C. Sometimes

D. Often

E. Always

43. After stopping the insulin pump, do you follow up on the follow-up hypoglycemic treatment plan? ( )

A. Never

B. Occasionally

C. Sometimes

D. Often

E. Always

44. Your attitude towards the use of islet pumps in the department for blood sugar control ( )

A. Disagree

B. Somewhat agree

C. General

D. Agree

E. Strongly agree
